# The Effect of Magnesium Supplementation on Blood Pressure: A Meta-Analysis of Randomized Clinical Trials

Sun Ha Jee, Edgar R. Miller III, Eliseo Guallar, Vikesh K. Singh, Lawrence J. Appel, and Michael J. Klag

**Background:** An increased intake of magnesium might lower blood pressure (BP), yet evidence from clinical trials is inconsistent, perhaps as a result of small sample size or heterogeneity in study design.

**Methods:** We performed a meta-analysis of randomized trials that tested the effects of magnesium supplementation on BP. Twenty trials meeting the inclusion criteria were identified. Random effects models and meta-regression methods were used to pool study results and to determine the dose–response relationship of magnesium to BP.

**Results:** The 20 studies included 14 of hypertensive and 6 of normotensive persons totaling 1220 participants. The doses of magnesium ranged from 10 to 40 mmol/day (median, 15.4 mmol/day). Magnesium supplementation resulted in only a small overall reduction in BP. The pooled net estimates of BP change (95%

confidence interval [CI]) were  $-0.6$  ( $-2.2$  to  $1.0$ ) mm Hg for systolic BP and  $-0.8$  ( $-1.9$  to  $0.4$ ) mm Hg for diastolic BP. However, there was an apparent dose-dependent effect of magnesium, with reductions of 4.3 mm Hg systolic BP (95% CI 6.3 to 2.2;  $P < .001$ ) and of 2.3 mm Hg diastolic BP (95% CI 4.9 to 0.0;  $P = .09$ ) for each 10 mmol/day increase in magnesium dose.

**Conclusions:** Our meta-analysis detected dose-dependent BP reductions from magnesium supplementation. However, adequately powered trials with sufficiently high doses of magnesium supplements need to be performed to confirm this relationship. *Am J Hypertens* 2002;15: 691–696 © 2002 American Journal of Hypertension, Ltd.

**Key Words:** Meta-analysis, magnesium supplements, blood pressure.

Experimental and metabolic studies suggest that magnesium has a role in blood pressure (BP) regulation.<sup>1</sup> For example, in vitro studies have shown that magnesium influences cell membrane sodium pump activity, which in turn affects sodium–potassium transport across cell membranes, and subsequently vascular tone and reactivity.<sup>2</sup> In addition, clinical studies have demonstrated significant BP reductions with parenteral high-dose magnesium in patients with eclampsia and glomerulonephritis.<sup>3,4</sup> This line of evidence, albeit indirect, suggests that an increased intake of magnesium might lower BP in otherwise healthy populations of free-living individuals.

In observational epidemiologic studies, several studies suggest an inverse association between dietary magnesium intake and BP.<sup>5</sup> However, this association is difficult to

interpret because of the imprecision of dietary data and colinearity of magnesium intake with other dietary components.<sup>6</sup> In 1983, Dyckner and Wester<sup>7</sup> reported results from the first clinical trial of low-dose magnesium supplementation. Since then, a large number of supplement trials in humans have been published.<sup>8–32</sup> Results of these trials have been inconsistent, perhaps because of small sample sizes or design limitations. The process of conducting a meta-analysis allows one to explore the basis of this heterogeneity and to estimate an effect size with precision.<sup>33–36</sup>

The objective of this meta-analysis was to determine whether magnesium supplementation reduces BP, to identify the dose–response relationship, and to determine trial characteristics associated with greatest BP reductions.

Received December 26, 2001. First decision March 13, 2002. Accepted March 26, 2002.

From the Department of Epidemiology and Disease Control (SHJ), Yonsei University Graduate School of Health Science and Management, Seoul, Korea; Welch Center for Prevention, Epidemiology and Clinical Research (ERM, EG, LJA, MJK) and Department of Medicine (ERM, VKS, LJA, MJK), The Johns Hopkins University School of Medicine, Baltimore, Maryland; and Department of Epidemiology (ERM, EG, LJA, MJK), Johns Hopkins University Bloomberg School of Public Health,

Baltimore, Maryland.

This study was supported by a research fellowship grant from the Four Schools Physician–Scientist Program (VKS), grants from the NIH NIDDK (MJK) K24 DK02856 and NHLBI K08 HL03857 (ERM).

Address correspondence and reprint requests to Dr. Edgar R. Miller III, Welch Center for Prevention, Epidemiology & Clinical Research, The Johns Hopkins Medical Institutions, 2024 E. Monument Street, Suite 2-600, Baltimore, MD 21205-2223; e-mail: ermiller@welch.jhu.edu

**Table 1.** Participants and study design characteristics of 20 magnesium supplementation trials

| Author, Year           | No. of Subjects | Mean age (y) | % Female | Study Design | Duration (wk) | Pretreatment BP (mm Hg) |     | Mg Supplement           | Mg Dose (mmol/day) | Diuretic Use |
|------------------------|-----------------|--------------|----------|--------------|---------------|-------------------------|-----|-------------------------|--------------------|--------------|
|                        |                 |              |          |              |               | SBP                     | DBP |                         |                    |              |
| Dyckner et al, 1983    | 39              | 65           | 66       | P -          | 24            | 153                     | 92  | Mg aspartate            | 15.0               | Yes          |
| Reyes et al, 1984      | 21              | 57           | 80       | P D          | 3             | 158                     | 110 | MgCl <sub>2</sub>       | 15.8               | Yes          |
| Cappuccio et al, 1985  | 17              | 52           | 47       | C D          | 4             | 154                     | 100 | Mg aspartate            | 15.0               | No           |
| Henderson et al, 1986  | 40              | 62           | 50       | P -          | 24            | 156                     | 90  | MgO                     | 12.4               | Yes          |
| Saito et al, 1988      | 20              | 57           | 25       | P D          | 4             | 134                     | 80  | MgO                     | 24.7               | Yes          |
| Nowson et al, 1989     | 25              | 63           | 32       | P D          | 8             | 153                     | 91  | Mg aspartate            | 10.0               | No           |
| Patki et al, 1990      | 37              | 50           | 78       | C D          | 8             | 155                     | 100 | MgCl <sub>2</sub>       | 20.0               | No           |
| Zemel et al, 1990      | 13              | 51           | 14       | P D          | 12            | 143                     | 90  | Mg aspartate            | 40.0               | No           |
| Lind et al, 1991       | 71              | 61           | 46       | P D          | 24            | 150                     | 92  | Mg lactate & Mg citrate | 15.0               | No           |
| TOHP, 1992             | 461             | 43           | 68       | P D          | 24            | 125                     | 84  | Mg diglycine            | 15.0               | No           |
| Ferrara et al, 1992    | 14              | 48           | 43       | P D          | 24            | 157                     | 95  | Mg pidolate             | 15.0               | No           |
| Widman et al, 1993     | 17              | 50           | 12       | C D          | 9             | 154                     | 99  | Mg (OH) <sub>2</sub>    | 28.3               | No           |
| Plum et al, 1994       | 39              | 39           | 39       | C D          | 8             | 150                     | 97  | Mg aspartate            | 15.0               | No           |
| Witteman et al, 1994   | 91              | 57           | 100      | P D          | 24            | 146                     | 89  | Mg aspartate            | 20.0               | No           |
| Purvis et al, 1994     | 28              | 54           | 86       | C -          | 24            | 142                     | 80  | MgCl <sub>2</sub>       | 15.8               | No           |
| Sanjuliani et al, 1996 | 15              | 50           | 53       | C D          | 3             | 159                     | 107 | MgO                     | 24.7               | No           |
| Itoh et al, 1997       | 33              | 65           | 68       | P D          | 4             | 126                     | 76  | Mg(OH) <sub>2</sub>     | 18.9               | No           |
| Sacks et al, 1998      | 153             | 39           | 100      | P D          | 16            | 116                     | 74  | Mg lactate              | 14.0               | No           |
| Kawano et al, 1998     | 60              | 58           | 43       | C -          | 8             | 134                     | 81  | MgO                     | 20.0               | No           |
| Doyle et al, 1999      | 26              | 23           | 100      | C D          | 4             | 113                     | 77  | Mg (OH) <sub>2</sub>    | 10.3               | No           |

BP = blood pressure; SBP = systolic blood pressure; DBP = diastolic blood pressure; Mg = magnesium.

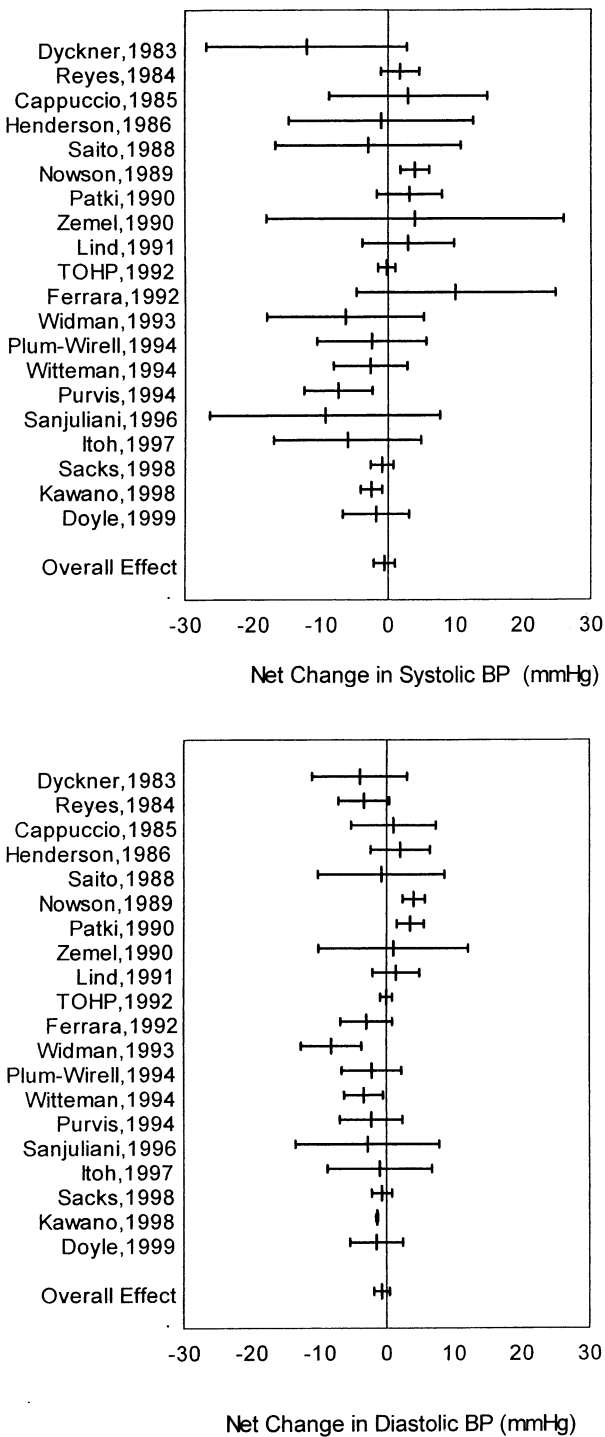

**FIG. 1.** Net change in systolic and diastolic blood pressure (BP) associated with magnesium (Mg) supplementation in 20 clinical trials. The overall effect is weighted by the inverse of the total variance of each trial.

## Methods

We searched the English language literature for all reports on magnesium supplementation and BP in humans published before May 2001. Search strategies included: 1) a MEDLINE search using the medical subject headings

magnesium and BP in clinical trials; 2) a review of reference lists from original research and review articles; and 3) a review of the authors' reference files. Thirty-one articles were identified.<sup>2-33</sup>

Our prespecified inclusion criteria were: 1) random allocation of participants, 2) use of magnesium supplementation alone as the active treatment, 3) presence of a control group, and 4) sufficient data to calculate the difference in BP change between the active treatment and control and the standard error of this difference. Twenty studies met the inclusion criteria. The major reasons for exclusion were: 1) nonrandomized treatment allocation,<sup>2,30</sup> 2) lack of a concurrent control group,<sup>29</sup> 3) insufficient data to calculate the net change in BP or standard error,<sup>30-32</sup> and 4) the combination of magnesium with other minerals that affect BP.<sup>27,28,32</sup>

Two investigators (SJ and VS) independently abstracted the articles. Disagreements or uncertainties were adjudicated by consensus. From each article, the following data were abstracted: 1) characteristics of the study population including sample size, age, gender, proportion with hypertension, baseline magnesium intake, and BP level, 2) characteristics of the design including duration of intervention, treatment dose, and type of magnesium carrier, and 3) change in BP and associated variance. For crossover trials, we used mean BP during the control period as the baseline values.

## Statistical Analysis

For parallel trials, net change in BP was calculated as the mean difference (magnesium supplementation minus control) of the change (follow-up minus baseline) in BP. For crossover trials, net change was calculated as the mean difference between the end of the magnesium supplementation and control periods. To calculate the pooled effects, each study was assigned a weight equivalent to the reciprocal of the variance of net change. For parallel trials in which the variance of paired differences during the trial was reported separately for several groups, we calculated variance for net change using standard methods.<sup>35</sup>

Estimates of the mean effect of magnesium supplementation on BP and the corresponding 95% confidence intervals (CI) were calculated using both fixed effects and random effects models. Both approaches yielded similar patterns. Homogeneity of effect size across trials was tested by Q statistics.<sup>34</sup> Because there was substantial and significant heterogeneity in effect size across trials, we used meta-regression techniques to evaluate the impact of magnesium dose and other factors on study results.<sup>35,36</sup>

To examine potential publication bias, we plotted the sample sizes of the studies against their corresponding effect size.<sup>35</sup>

## Results

Participant and design characteristics of the 20 clinical trials are presented in Table 1. The trials were conducted

**Table 2.** Meta-regression model of the efficacy magnesium supplementation on blood pressure reduction

| Factor                           | SBP Difference<br>Magnesium–Control |       | DBP Difference<br>Magnesium–Control |     |
|----------------------------------|-------------------------------------|-------|-------------------------------------|-----|
|                                  | Effect (95% CI)                     | P     | Effect (95% CI)                     | P   |
| Magnesium dose (per 10 mmol/day) | −4.3 (−6.3 to −2.2)                 | <.001 | −2.3 (−4.9 to 0.0)                  | .09 |
| Baseline BP (per 10 mm Hg)       | 0.8 (0.3 to 1.3)                    | .02   | 0.0 (−1.4 to 1.4)                   | .97 |
| Intercept                        | 2.7 (−9.7 to 15.1)                  | .67   | −4.2 (−11.6 to 3.14)                | .26 |

CI = confidence interval; other abbreviations as in Table 1.

between 1983 and 2001; the sample size varied from 13 to 461 participants, with a median of 30.5 participants per trial. The total number of participants was 1220. All of the trials were conducted in adults, with a range of mean ages from 23 to 65 years. Seventeen of the 20 trials included both men and women, whereas women were the sole participants in the remaining three trials. A crossover design was used in 8 trials, whereas a parallel arm design was used in the remaining 12 trials. Sixteen of the trials were double-blind, whereas the remaining 4 trials did not report information about blinding. The trials varied in length from 3 to 24 weeks, with a median duration of 8.5 weeks. The dose of magnesium supplementation in the active treatment group varied from 10 to 40 mmol/day, with a median of 15.4 mmol/day. Four trials were conducted in persons who were concurrently taking a diuretic. In the 20 trials, eight different compounds of magnesium were used (MgO, Mg aspartate, MgCl<sub>2</sub>, MgOH<sub>2</sub>, Mg diglyceride, Mg citrate, Mg lactate, and Mg pidolate).

Systolic BP (SBP) decreased in the magnesium group compared to the control in 14 of the 20 trials; in 2 trials, the SBP reduction was statistically significant, whereas in 1 trial, magnesium significantly increased SBP (Fig. 1). Overall, magnesium supplementation reduced SBP by 0.6 mm Hg (95% CI −2.2 to 1.0,  $P = .051$ ). Diastolic BP (DBP) decreased in the magnesium group compared to control in 14 of the 20 trials. In three trials, the DBP reduction was statistically significant (Fig. 1). The pooled estimate of the effect of magnesium supplementation on DBP was a net decrease of 0.8 mm Hg (95% CI −2.1 to 0.5,  $P = .142$ ). The test for heterogeneity was highly significant both for SBP and DBP changes ( $P < .001$ ), indicating that additional factors could impact the efficacy of magnesium in reducing BP.

When limiting the analysis to the 16 double-blind studies (excluding single-blinded studies), a 10 mmol/day increase in magnesium intake was associated with a decrease in SBP of 3.4 mm Hg (95% CI 0.6 to 6.1,  $P = .02$ ) and a decrease in DBP of 2.0 mm Hg (95% CI −0.9 to 5.0,  $P = .18$ ). Limiting the analysis to the 14 hypertensive trials (i.e., trials with average baseline SBP >140 mm Hg or DBP >90 mm Hg), magnesium (per 10 mmol/day) decreased SBP by 3.3 mm Hg (95% CI −0.1 to 6.8,  $P = .06$ ) and DBP by 2.3 mm Hg (95% CI −1.0 to 5.6,  $P = .17$ ).

Table 2 summarizes the results of meta-regression analyses that examined the dose–response relationship be-

tween magnesium and BP (Fig. 2). For each 10 mmol/day larger dose of magnesium SBP decreased by 4.3 mm Hg (95% CI 6.3 to 2.2,  $P < .001$ ) and DBP by 2.3 mm Hg (95% CI 4.9 to 0.0,  $P = .09$ ). In addition, the effect of magnesium on SBP was stronger in trials with lower baseline SBP, although this effect was absent for DBP. The meta-regression model completely explained the residual heterogeneity for the effect of magnesium on SBP, but not on DBP (estimated between-study variation,  $\tau = 2.3$  mm Hg). Other factors, including age, gender, trial design (crossover versus parallel), and duration were not significantly associated with magnesium efficacy.

The plot of sample size versus effect size was funnel-shaped with little variation in the average effect size for the studies with larger sample size (not shown), thus minimizing the possibility that our findings could be explained by publication bias.

## Discussion

To our knowledge, this is the first quantitative review of randomized trials that tested the effect of magnesium supplementation on BP. Although magnesium supplementation resulted in a small overall reduction in BP, there was an apparent dose-dependent effect of magnesium, specifically reductions of 4.3 mm Hg SBP and of 2.3 mm Hg DBP for each 10 mmol/day increase in magnesium dose.

The majority of trials included in this study (>70%) showed reductions in either SBP or DBP individually, yet were likely underpowered to detect small reductions in BP. Larger effect sizes would be expected in hypertensive persons, but the paucity of large trials in persons with hypertension might explain why significant findings in individual studies for SBP reduction was found only in trials of normotensive persons.

Our results indicate a greater efficacy that magnesium supplementation may have at higher doses. Such findings might explain why small trials that administered small doses of magnesium (10 to 15 mmol/day) failed to detect significant effects. Few studies were conducted in the higher dose range of magnesium (20 to 40 mmol/day). Properly designed and adequately powered trials at higher dose ranges need to be performed to confirm the inverse dose–response relationship that we detected.

One potential limitation is a lack of data on dietary intake of magnesium. In those trials that enrolled partici-

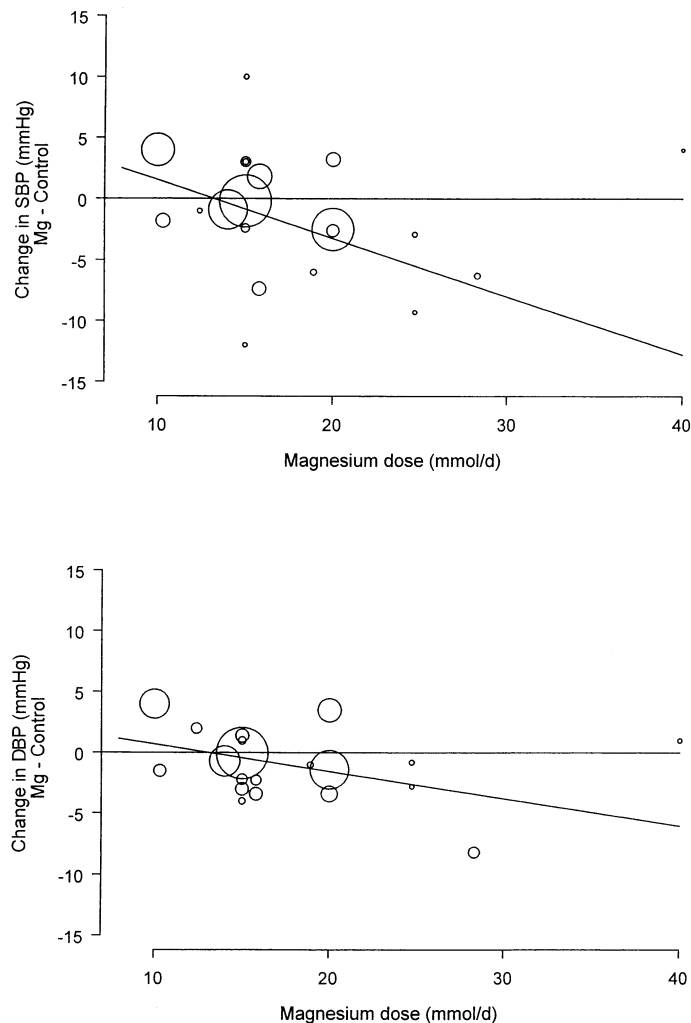

**FIG. 2.** Dose–response effect of Mg on systolic (SBP) and diastolic (DBP) blood pressure. Each **circle** represents a study, with the area of each **circle** inversely proportional to study variance. Other abbreviation as in Fig. 1.

pants diagnosed with hypertension, participants may have already increased dietary intake of magnesium-rich foods as a result of this diagnosis. Such modifications may have led to heterogeneity in the estimates of the magnesium–BP relationship. In addition, although the median amount of magnesium administered in these trials, 15 mmol/day, results in about a doubling of usual daily magnesium intake derived from diet (median  $\sim$ 12.5 mmol/day for men in the United States), it may not be a sufficiently large enough dose to produce a clinically relevant effect. Hence, as suggested by our pooled dose–response analysis, important BP-lowering effects may occur only at higher doses.

Other potential limitations include heterogeneity in study design, study participants, and in the type of magnesium supplement used. Absorption of magnesium supplements varies for different anions. Hence, some forms of administered magnesium may have had lower bioavailability, which would diminish the BP-lowering effect. Finally, our analysis contains only articles published in the English language. Studies in the English language literature may show a greater intervention effect than research that is never published or

that is published in languages other than English. However, analysis of a funnel plot of study size did not show evidence of publication bias.

In summary, our meta-analysis detected significant, dose-dependent BP reductions from magnesium supplementation. This effect is consistent with experimental studies and with the effect of intravenous magnesium. However, there is still considerable uncertainty on the clinical utility of magnesium supplements. Adequately powered trials with sufficiently high doses of magnesium supplements need to be performed to confirm the inverse dose–response relationship observed in our study.

## References

1. Resnick L: The cellular ionic basis of hypertension and allied clinical conditions. *Prog Cardiovasc Dis* 1999;42:1–22.
2. Motoyama T, Sano H, Fukuzaki H: Oral magnesium supplementation in patients with essential hypertension. *Hypertension* 1989;13:227–232.

3. Winkler AW, Smith PK, Hoff HE: Intravenous magnesium sulfate in the treatment of nephritic convulsions in adults. *J Clin Invest* 1942;21:207–216.
4. Albert DG, Morita Y, Iseri LT: Serum magnesium and plasma sodium levels in essential vascular hypertension. *Circulation* 1958;17:761–764.
5. Ma J, Folsom AR, Melnick SL, Eckfeldt JH, Sharrett AR, Nabulsi AA, Hutchinson RG, Metcalf PA: Associations of serum and dietary magnesium with cardiovascular disease, hypertension, diabetes, insulin, and carotid arterial wall thickness: the ARIC Study. *J Clin Epidemiol* 1995;48:927–940.
6. Mizushima S, Cappuccio FP, Nichols R, Elliott P: Dietary magnesium intake and blood pressure: a qualitative overview of the observational studies. *J Hum Hypertens* 1998;12:447–453.
7. Dyckner T, Wester PO: Effect of magnesium on blood pressure. *BMJ* 1983;286:1847–1849.
8. Reyes AJ, Leary WP, Acosta-Barríos TN, Davis WH: Magnesium supplementation in hypertension treated with hydrochlorothiazide. *Curr Therap Res* 1984;36:332–340.
9. Cappuccio FP, Markandu ND, Beynon GW, Shore AC, Sampson B, MacGregor GA: Lack of effect of oral magnesium on high blood pressure: a double blind study. *BMJ* 1985;291:235–238.
10. Henderson DG, Schierup J, Schodt T: Effect of magnesium supplementation on blood pressure and electrolyte concentrations in hypertensive patients receiving long term diuretic treatment. *BMJ* 1986;293:664–665.
11. Saito K, Hattori K, Omatsu T, Hirouchi H, Sano H, Fukuzaki H: Effects of oral magnesium on blood pressure and red cell sodium transport in patients receiving long-term thiazide diuretics for hypertension. *Am J Hypertens* 1988;1(Suppl):71S–74S.
12. Nowson CA, Morgan TO: Magnesium supplementation in mild hypertensive patients on a moderately low sodium diet. *Clin Experimental Pharmacol Physiol* 1989;16:299–302.
13. Patki PS, Singh J, Gokhale SV, Bulakh PM, Shrotri DS, Patwardhan B: Efficacy of potassium and magnesium in essential hypertension: a double blind, placebo controlled, crossover study. *BMJ* 1990;301:521–523.
14. Zemel PC, Zemel MB, Urberg M, Douglas FL, Geiser R, Sowers JR: Metabolic and hemodynamic effects of magnesium supplementation in patients with essential hypertension. *Am J Clin Nutr* 1990;51:665–669.
15. Lind L, Lithell H, Pollare T, Ljunghall S: Blood pressure response during long-term treatment with magnesium is dependent on magnesium status. A double-blind, placebo-controlled study in essential hypertension and in subjects with high-normal blood pressure. *Am J Hypertens* 1991;4:674–679.
16. The trials of hypertension prevention collaborative research group (TOHP): The effects of nonpharmacologic interventions on blood pressure of persons with high normal levels. *JAMA* 1992;267:1213–1220.
17. Ferrara LA, Iannuzzi R, Castaldo A, Iannuzzi A, Russo AD, Mancini M: Long-term magnesium supplementation in essential hypertension. *Cardiology* 1992;81:25–33.
18. Widman L, Wester PO, Stegmayr BK, Wirell M: The dose-dependent reduction in blood pressure through administration of magnesium. A double blind placebo controlled cross-over study. *Am J Hypertens* 1993;6:41–45.
19. Plum-Wirell M, Stegmayr BG, Wester PO: Nutritional magnesium supplementation does not change blood pressure nor serum or muscle potassium and magnesium in untreated hypertension. A double-blind crossover study. *Magnesium Res* 1994;7:277–283.
20. Witteman JCM, Grobbee DE, Derk FHM, Bouillon R, de Bruijn AM, Hofman A: Reduction of blood pressure with oral magnesium supplementation in women with mild to moderate hypertension. *Am J Clin Nutr* 1994;60:129–135.
21. Purvis JR, Cummings DM, Landsman P, Carroll R, Barakat H, Bray J, Whitley C, Horner RD: Effect of oral magnesium supplementation in selected cardiovascular risk factors in non-insulin-dependent diabetes. *Arch Fam Med* 1994;3:503–507.
22. Sanjuliani AF, Fagundes VG, Francischetti EA: Effects of magnesium on blood pressure and intracellular ion levels of Brazilian hypertensive patients. *Intern J Cardiol* 1996;56:177–183.
23. Ioth K, Kawasaki T, Nakamura M: The effects of high oral magnesium supplementation on blood pressure, serum lipids and related variables in apparently healthy Japanese subjects. *Brit J Nutr* 1997;78:737–750.
24. Sacks FM, Willett WC, Smith A, Brown LE, Rosner B, Moore TJ: Effect on blood pressure of potassium, calcium, and magnesium in women with low habitual intake. *Hypertension* 1998;31:131–138.
25. Kawano Y, Matsuoka H, Takishita S, Omae T: Effects of magnesium supplementation in hypertensive patients. Assessment by office, home, and ambulatory blood pressures. *Hypertension* 1998;32:260–265.
26. Doyle L, Flynn A, Cashman K: The effect of magnesium supplementation on biochemical markers of bone metabolism or blood pressure in healthy young adult females. *Eur J Clin Nutr* 1999;53:255–261.
27. Kawasaki T, Itoh K, Kawasaki M: Reduction in blood pressure with a sodium-reduced, potassium- and magnesium-enriched mineral salt in subjects with mild essential hypertension. *Hypertens Res* 1998;21:235–243.
28. Katz A, Rosenthal T, Maoz C, Peleg F, Zeidenstein R, Levi Y: Effects of a mineral salt diet on 24-h blood pressure monitoring in elderly hypertensive patients. *J Hum Hypertens* 1999;13:777–780.
29. Cohen L, Laor A, Kitzes R: Reversible retinal vasospasm in magnesium-treated hypertension despite no significant change in blood pressure. *Magnesium* 1984;3:159–163.
30. Kisters K, Spieker C, Tepel M, Zidek W: New data about the effects of oral physiological magnesium supplementation on several cardiovascular risk factors (lipids and blood pressure). *Magnesium Res* 1993;6:355–360.
31. Sibai BM, Villar MA, Bray E: Magnesium supplementation during pregnancy: a double-blind randomized controlled clinical trial. *Am J Obstet Gynecol* 1989;161:115–119.
32. Sacks FM, Brown LE, Appel L, Borhani NO, Evans D, Whelton P: Combinations of potassium, calcium, and magnesium supplements in hypertension. *Hypertension* 1995;26:950–956.
33. Rice JA: *Mathematical Statistics and Data Analysis*. Belmont, Duxbury Press, 1998.
34. DerSimonian R, Laird N: Systematic Reviews in Health Care. Meta-analysis in clinical trials. *Control Clin Trials* 1986;7:177–188.
35. Egger M, Smith GD, Altman DG: *Systematic Reviews in Health Care. Meta-analysis in Context*, 2nd ed. London, BMJ Books, 2001.
36. Thompson SG, Sharp SJ: Explaining heterogeneity in meta-analysis: a comparison of methods. *Statist Med* 1999;18:2693–2708.
